# Supplementary material for: Exploring the electrochemical performance of layered Bi2Se3 hexagonal platelets as the anode material for lithium-ion batteries
Source: Royal Society of Chemistry journal article supplement (doi:10.1039/d4cp03013c), 2024-01-01
Supplement: d4cp03013c1.pdf [file d4cp03013c1.pdf]

## Supplementary Information for:

# Exploring Electrochemical Performance of Layered $\text{Bi}_2\text{Se}_3$ Hexagonal Platelets as Anode Material for Lithium-Ion Batteries

Shaik M. Abzal <sup>a ‡</sup>, Sumit Khatua <sup>a ‡</sup>, Kurapati Kalyan <sup>a</sup>, Sai Lakshmi Janga <sup>a</sup>, Rajkumar Patel <sup>b,\*</sup>, L.N. Patro <sup>a,\*</sup>, Jatis Kumar Dash <sup>a,\*</sup>

<sup>a</sup> *Department of Physics, SRM University-AP, Amaravati 522240, India.*

<sup>b</sup> *Energy and Environmental Science and Engineering (ESEE), Integrated Science and Engineering Division (ISED), Underwood International College, Yonsei University, Yeonsu-gu, Incheon 21983, South Korea.*

‡ These authors have equally contributed to this work.

\*Corresponding Authors

**E-mail:** [JKD: [jatis.d@srmmap.edu.in](mailto:jatis.d@srmmap.edu.in), [jatiskumar@gmail.com](mailto:jatiskumar@gmail.com)],

[LNP: [laxminarayana.p@srmmap.edu.in](mailto:laxminarayana.p@srmmap.edu.in)], [RP: [rajkumar@yonsei.ac.kr](mailto:rajkumar@yonsei.ac.kr)]

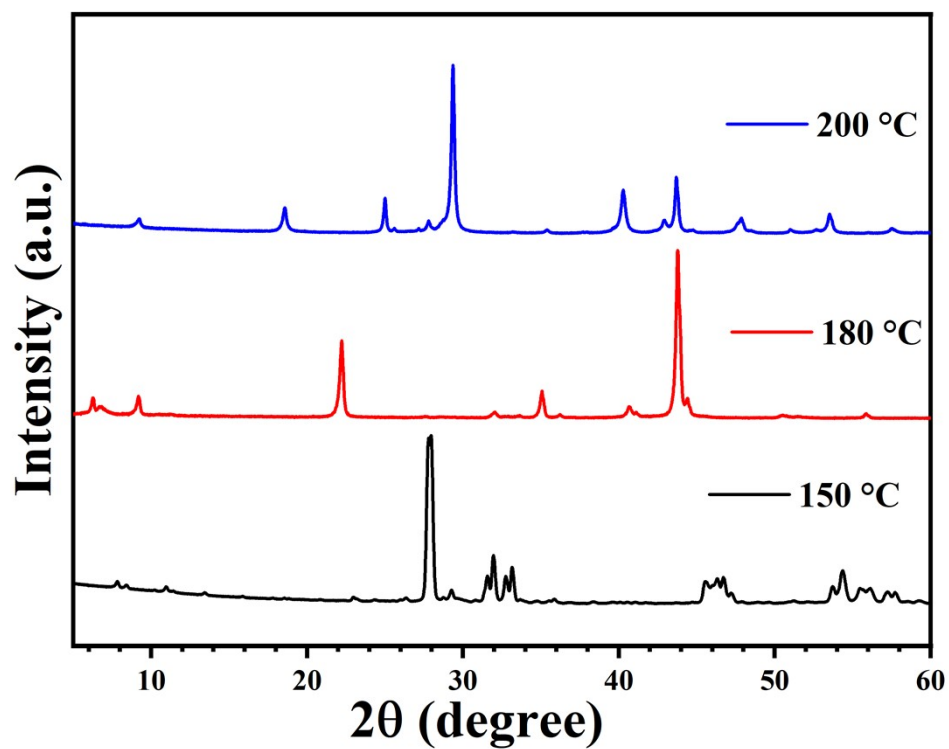

Fig S1. XRD patterns of  $\text{Bi}_2\text{Se}_3$  at various synthesis temperatures.

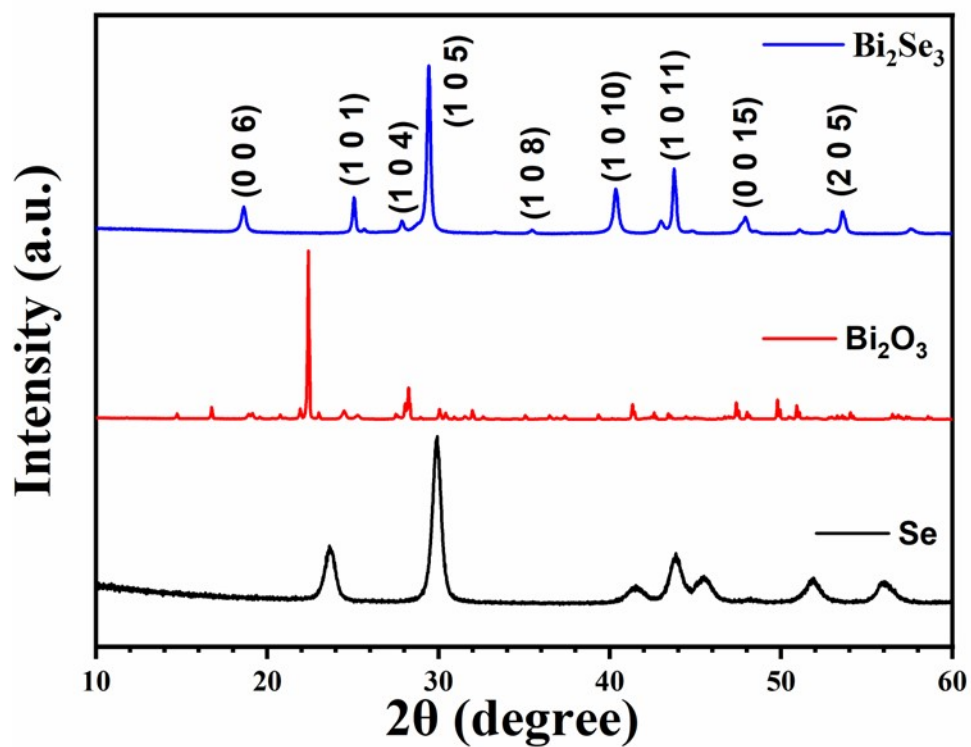

Fig S2. XRD pattern of  $\text{Bi}_2\text{Se}_3$  with precursor material,  $\text{Bi}_2\text{O}_3$  and Se.

| S.no                     | Peak position (2θ °) | FWHM (rad) | Crystallite Size (nm) |
|--------------------------|----------------------|------------|-----------------------|
| 1.                       | 9.26                 | 0.0052     | 26.3                  |
| 2.                       | 18.62                | 0.0055     | 25.2                  |
| 3.                       | 25.06                | 0.0032     | 43.5                  |
| 4.                       | 29.4                 | 0.0044     | 32.1                  |
| 5.                       | 43.7                 | 0.0041     | 35.6                  |
| Average crystallite size |                      |            | 32.5                  |

**Table S1.** The Average crystallite size of the Bi<sub>2</sub>Se<sub>3</sub>.

The average crystallite size of the hexagonal Bi<sub>2</sub>Se<sub>3</sub> is calculated by using the Debye-Scherrer

equation,  $D = \frac{k\lambda}{\beta \cos \theta}$ , where  $k$  represents the Scherrer constant ( $k = 0.9$ ),  $\lambda$  denotes the wavelength of X-rays used (1.54 Å),  $\beta$  refers to the full width at half maximum (FWHM) of the diffraction peak, and  $\theta$  is the Bragg's angle.

**Table S2.** The morphology of Bi<sub>2</sub>Se<sub>3</sub> reported by different synthesis methods.

| Synthesis methods  | Morphology   | Reference |
|--------------------|--------------|-----------|
| Template synthesis | Micropillars | 1         |

|                           |                               |   |
|---------------------------|-------------------------------|---|
| Chemical vapor deposition | Triangular or hexagonal shape | 2 |
| Chemical vapor deposition | Nano wire & Nano ribbons      | 3 |
| Microwave assisted        | Nano Sheets                   | 4 |
| One-pot reaction          | Nano dots                     | 5 |

**TEM EDX:**

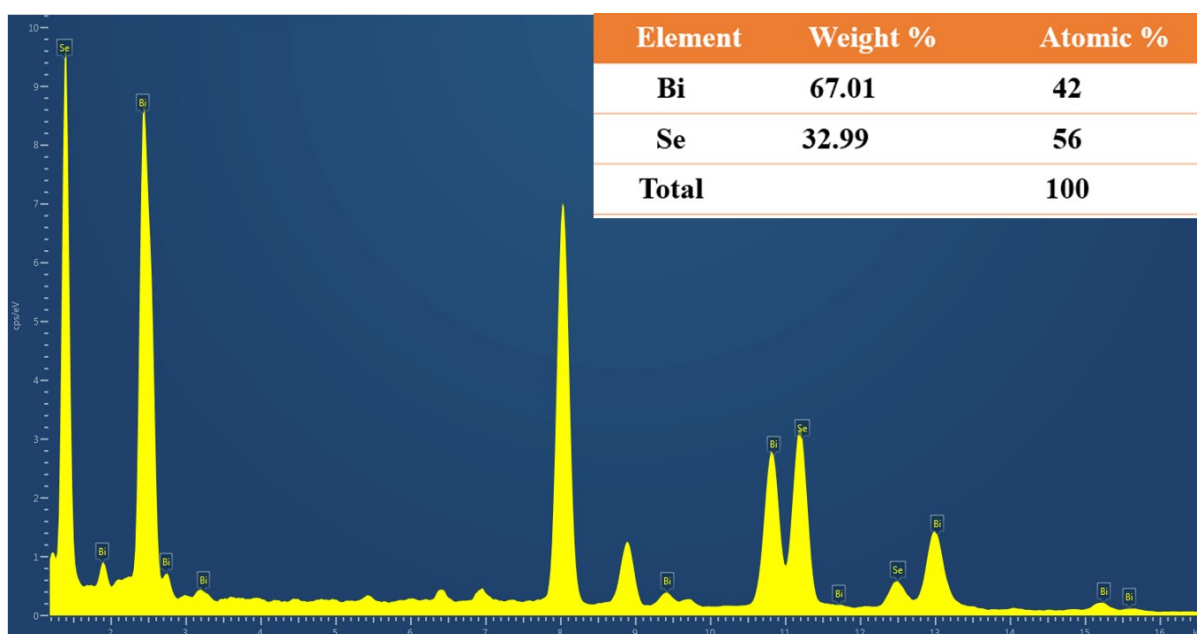

**Fig S3.** TEM (EDAX) *Energy-dispersive X-ray analysis* of  $\text{Bi}_2\text{Se}_3$ .

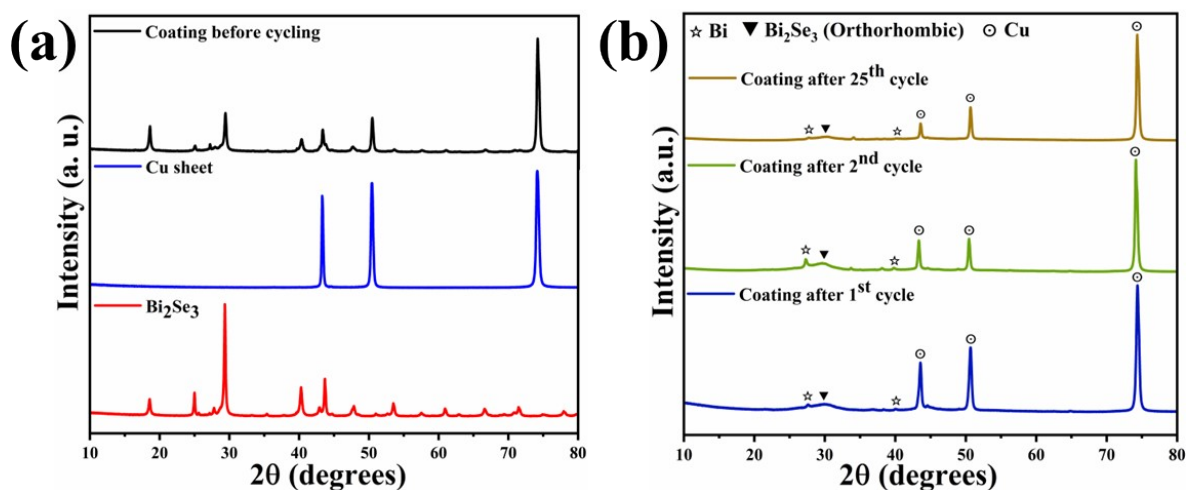

**Fig S4.** XRD pattern of (a) pure Bi<sub>2</sub>Se<sub>3</sub>, Cu sheet, Bi<sub>2</sub>Se<sub>3</sub> coated on Cu sheet. (b) Bi<sub>2</sub>Se<sub>3</sub> anode materials after 1<sup>st</sup>, 2<sup>nd</sup>, and 25<sup>th</sup> cycle (3V charging) coated on copper sheet.

Figure S4 (b) shows the XRD pattern of Bi<sub>2</sub>Se<sub>3</sub> anode materials after 1<sup>st</sup>, 2<sup>nd</sup>, and 25<sup>th</sup> cycle (3V charging) coated on copper sheet. As shown in figure, the sharp peak at 43.5, 50.7, and 74.2° correspond to the peak due to copper sheet.

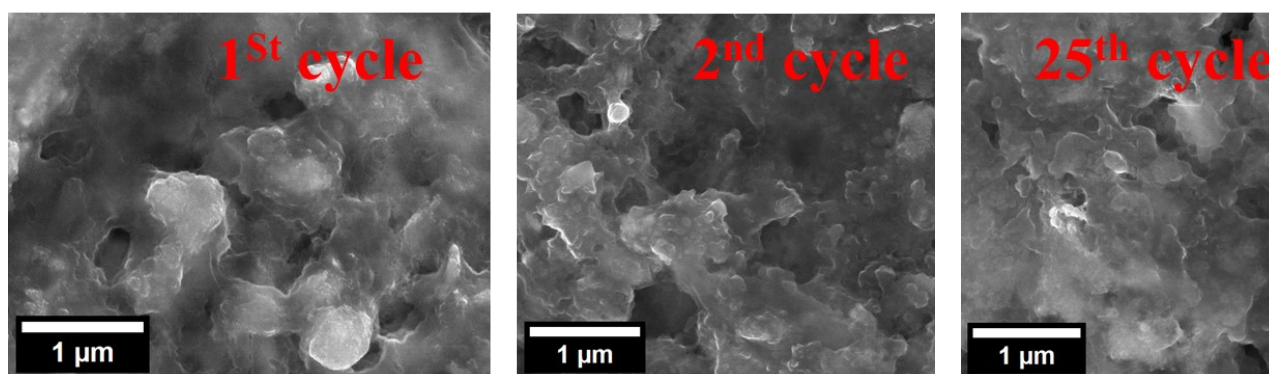

**Fig S5.** Surface morphology of Bi<sub>2</sub>Se<sub>3</sub> after (a) 1<sup>st</sup> cycle Cu sheet, Bi<sub>2</sub>Se<sub>3</sub> coated on Cu sheet. (b), 2<sup>nd</sup> cycle, (c) 25<sup>th</sup> cycle.

#### Reference:

- (1) Klösel, K.; Pané, S.; Mihailovic, I. A.; Hierold, C. Template-assisted electrosynthesis of thick stoichiometric thermoelectric Bi<sub>2</sub>Se<sub>3</sub> micropillars. *Electrochimica Acta* **2022**, *403*.
- (2) Jiang, Y.; Zhang, X.; Wang, Y.; Wang, N.; West, D.; Zhang, S.; Zhang, Z. Vertical/planar growth and surface orientation of Bi<sub>2</sub>Te<sub>3</sub> and Bi<sub>2</sub>Se<sub>3</sub> topological insulator nanoplates. *Nano Lett.* **2015**, *15* (5), 3147–3152.

- (3) Zou, Y.; Chen, Z. G.; Huang, Y.; Yang, L.; Drennan, J.; Zou, J. Anisotropic electrical properties from vapor-solid-solid grown Bi<sub>2</sub>Se<sub>3</sub> nanoribbons and nanowires. *J. Phys. Chem. C* **2014**, *118* (35), 20620–20626.
- (4) Xu, H.; Chen, G.; Jin, R.; Chen, D.; Wang, Y.; Pei, J.; Zhang, Y.; Yan, C.; Qiu, Z. Microwave-assisted synthesis of Bi<sub>2</sub>Se<sub>3</sub> ultrathin nanosheets and its electrical conductivities. *CrystEngComm* **2014**, *16* (19), 3965–3970.
- (5) Mao, F.; Wen, L.; Sun, C.; Zhang, S.; Wang, G.; Zeng, J.; Wang, Y.; Ma, J.; Gao, M.; Li, Z. Ultrasmall Biocompatible Bi<sub>2</sub>Se<sub>3</sub> Nanodots for Multimodal Imaging-Guided Synergistic Radiophotothermal Therapy against Cancer. *ACS Nano* **2016**, *10* (12), 11145–11155.
